# Supplementary material
Source: PubMed Central journal article supplement (PMC9972545)
Supplement: NIHMS1873654-supplement-Supplemental_Material.pdf [file NIHMS1873654-supplement-Supplemental_Material.pdf]

## Supplemental Material

Model fit information for structural equation models for within sex and race comparisons

| Models                                                                        |        | Sex                 |       |       |       | Race                |          |       |       |       |
|-------------------------------------------------------------------------------|--------|---------------------|-------|-------|-------|---------------------|----------|-------|-------|-------|
|                                                                               |        | $\chi^2(\text{df})$ | CFI   | TLI   | RMSEA | $\chi^2(\text{df})$ | CFI      | TLI   | RMSEA |       |
| 1. Placement only, sleep problems, and adult arrests                          | Female | 7.98(8)             | 1.000 | 1.000 | 0.001 | White               | 7.04(8)  | 1.000 | 1.000 | 0.001 |
| 2. Placement for CM & delinquency, sleep problems, and adult arrests          | Female | 5.48(8)             | 1.000 | 1.000 | 0.001 | White               | 8.05(8)  | 0.998 | 0.994 | 0.008 |
| 3. Placement only, sleep problems, and internalizing symptoms                 | Female | 14.96(8)            | 0.971 | 0.944 | 0.026 | White               | 13.01(8) | 1.000 | 1.000 | 0.001 |
| 4. Placement for CM & delinquency, sleep problems, and internalizing symptoms | Female | 8.68(8)             | 1.000 | 1.000 | 0.001 | White               | 10.42(8) | 1.000 | 1.000 | 0.001 |
| 1. Placement only, sleep problems, and adult arrests                          | Male   | 4.53(8)             | 0.935 | 0.901 | 0.049 | Black               | 7.01(8)  | 1.000 | 1.000 | 0.001 |
| 2. Placement for CM & delinquency, sleep problems, and adult arrests          | Male   | 1.84(8)             | 1.000 | 1.000 | 0.001 | Black               | 7.45(8)  | 1.000 | 1.000 | 0.001 |
| 3. Placement only, sleep problems, and internalizing symptoms                 | Male   | 8.90(8)             | 0.973 | 0.930 | 0.036 | Black               | 9.06(8)  | 1.000 | 1.000 | 0.001 |
| 4. Placement for CM & delinquency, sleep problems, and internalizing symptoms | Male   | 8.52(8)             | 0.959 | 0.895 | 0.047 | Black               | 10.97(8) | 1.000 | 1.000 | 0.001 |

*Note.* CM = child maltreatment; CFI = comparative fit index; TLI = Tucker-Lewis index; RMSEA = root mean square error of approximation
